# Supplementary material for: QTL analysis of measures of mouse home-cage activity using B6/MSM consomic strains
Source: PubMed Central journal article supplement — Mamm Genome. 2010 Oct 1;21(9):477–85. doi: 10.1007/s00335-010-9289-z (PMC2974199; doi:10.1007/s00335-010-9289-z), 2010-10-01
Supplement: 335_2010_9289_MOESM1_ESM.pdf [file 335_2010_9289_MOESM1_ESM.pdf]

**Supplemental Table 1.** Mean values (+ SEM) of total home-cage activity. p values from the t-test with Bonferroni correction and Z scores estimated by using equation (3) from Belknap (2003) for comparison between B6 and consomic mouse strains.

|     | Total activity |        |              | Active time |        |              | Average activity |        |             |
|-----|----------------|--------|--------------|-------------|--------|--------------|------------------|--------|-------------|
|     |                | p      | Z            |             | p      | Z            |                  | p      | Z           |
| 1   | 9516 ± 1278    |        |              | 452 ± 23    |        |              | 20.0 ± 1.8       |        |             |
| 2C  | 9124 ± 850     |        |              | 463 ± 20    |        | 2.58         | 19.3 ± 1.3       |        |             |
| 2T  | 12306 ± 1172   | 0.025  | <b>5.17</b>  | 466 ± 17    |        | 2.80         | 25.7 ± 1.6       |        | <b>4.73</b> |
| 3   | 13305 ± 1238   | 0.004  | <b>6.60</b>  | 570 ± 21    | <0.001 | <b>10.54</b> | 22.6 ± 1.6       |        | 2.02        |
| 4   | 13879 ± 1631   | 0.004  | <b>7.41</b>  | 521 ± 23    | 0.015  | <b>6.92</b>  | 25.5 ± 2.4       |        | <b>4.54</b> |
| 6C  | 4242 ± 447     | <0.001 | <b>6.31</b>  | 362 ± 16    |        | <b>4.89</b>  | 11.3 ± 0.8       | <0.001 | <b>7.96</b> |
| 7T  | 5657 ± 661     | 0.010  | <b>4.30</b>  | 377 ± 19    |        | <b>3.74</b>  | 14.3 ± 1.3       | 0.011  | <b>5.31</b> |
| 8   | 8213 ± 953     |        |              | 423 ± 16    |        |              | 18.8 ± 1.6       |        |             |
| 9   | 5806 ± 621     | 0.015  | <b>4.09</b>  | 353 ± 16    | 0.027  | <b>5.57</b>  | 16.1 ± 1.2       |        | <b>3.73</b> |
| 11  | 4956 ± 419     | <0.001 | <b>5.30</b>  | 321 ± 14    | <0.001 | <b>7.92</b>  | 15.1 ± 0.9       | 0.038  | <b>4.57</b> |
| 12C | 8145 ± 805     |        |              | 428 ± 21    |        |              | 18.4 ± 1.2       |        |             |
| 12T | 10753 ± 836    |        | <b>2.96</b>  | 520 ± 14    | 0.004  | <b>6.80</b>  | 20.8 ± 1.6       |        |             |
| 13A | 17067 ± 1657   | <0.001 | <b>11.95</b> | 546 ± 18    | <0.001 | <b>8.79</b>  | 31.0 ± 2.8       | <0.001 | <b>9.37</b> |
| 14  | 12536 ± 1142   | 0.011  | <b>5.50</b>  | 465 ± 15    |        | <b>5.00</b>  | 24.9 ± 1.9       |        | <b>4.04</b> |
| 15  | 4100 ± 581     | <0.001 | <b>6.52</b>  | 316 ± 20    | <0.001 | <b>8.28</b>  | 12.0 ± 1.0       | <0.001 | <b>7.32</b> |
| 16  | 6770 ± 985     |        | 2.71         | 361 ± 13    |        | <b>4.92</b>  | 18.0 ± 2.1       |        | 2.05        |
| 17  | 9429 ± 463     |        |              | 421 ± 19    |        |              | 22.5 ± 0.7       |        |             |
| 19  | 8603 ± 877     |        |              | 475 ± 15    |        | <b>3.46</b>  | 17.7 ± 1.3       |        | 2.35        |
| Y   | 7152 ± 736     |        | 2.17         | 431 ± 13    |        |              | 16.3 ± 1.3       |        | <b>3.57</b> |
| B6  | 8675 ± 481     |        |              | 428 ± 14    |        |              | 20.3 ± 1.0       |        |             |
| MSM | 11791 ± 2435   |        |              | 384 ± 36    |        |              | 27.1 ± 2.9       |        |             |

p value: t-test after the Bonferroni correction; Z value: Belknap's equation 3.

Z scores, presented as absolute values, are considered to be significant when greater than 2.9.

**Supplemental Table 2.** Mean values (+SEM) of temporal components of home-cage activity. p values from the t-test with Bonferroni correction and Z scores estimated by using equation (3) from Belknap (2003) for comparison between B6 and consomic mouse strains.

|     | Anticipation |        |              | 1st phase   |        |              | 2nd phase  |        |              | 3rd phase  |        |             | Resting phase |        |              |
|-----|--------------|--------|--------------|-------------|--------|--------------|------------|--------|--------------|------------|--------|-------------|---------------|--------|--------------|
|     |              | p      | Z            |             | p      | Z            |            | p      | Z            |            | p      | Z           |               | p      | Z            |
| 1   | 819 ± 135    | <0.001 | <b>8.86</b>  | 4150 ± 670  |        |              | 1134 ± 148 |        |              | 1230 ± 151 |        | <b>4.37</b> | 2184 ± 339    | <0.001 | <b>12.17</b> |
| 2C  | 339 ± 71     |        |              | 4721 ± 471  |        |              | 1618 ± 159 |        |              | 1787 ± 190 |        |             | 659 ± 132     |        |              |
| 2T  | 396 ± 83     |        | 2.39         | 7654 ± 666  | <0.001 | <b>8.19</b>  | 1557 ± 202 |        |              | 2066 ± 251 |        |             | 633 ± 94      |        |              |
| 3   | 567 ± 74     | <0.001 | <b>4.93</b>  | 6135 ± 604  |        | <b>4.37</b>  | 3313 ± 391 | <0.001 | <b>11.65</b> | 2272 ± 240 |        | <b>3.34</b> | 1019 ± 134    |        |              |
| 4   | 250 ± 77     |        |              | 7123 ± 851  | 0.006  | <b>6.85</b>  | 3396 ± 569 | <0.001 | <b>12.15</b> | 2130 ± 271 |        | 2.29        | 979 ± 208     |        |              |
| 6C  | 55 ± 9       | 0.036  | 2.65         | 2099 ± 222  | <0.001 | <b>5.78</b>  | 841 ± 67   | 0.002  | <b>3.46</b>  | 907 ± 117  | <0.001 | <b>6.76</b> | 341 ± 68      | 0.008  | <b>4.21</b>  |
| 7T  | 269 ± 36     |        |              | 2719 ± 355  | 0.011  | <b>4.22</b>  | 894 ± 97   | 0.013  | <b>3.14</b>  | 883 ± 128  | <0.001 | <b>6.93</b> | 892 ± 131     |        |              |
| 8   | 431 ± 113    |        | <b>2.92</b>  | 4459 ± 523  |        |              | 1571 ± 226 |        |              | 1033 ± 92  | 0.004  | <b>5.82</b> | 718 ± 114     |        |              |
| 9   | 193 ± 48     |        |              | 2559 ± 297  | 0.002  | <b>4.63</b>  | 864 ± 110  | 0.013  | <b>3.32</b>  | 1514 ± 166 |        | 2.27        | 675 ± 100     |        |              |
| 11  | 124 ± 25     |        |              | 2520 ± 277  | 0.004  | <b>4.73</b>  | 918 ± 91   | 0.042  | <b>2.99</b>  | 1087 ± 123 | 0.015  | <b>5.43</b> | 308 ± 42      | 0.006  | <b>4.50</b>  |
| 12C | 230 ± 46     |        |              | 4335 ± 446  |        |              | 1584 ± 207 |        |              | 1303 ± 170 |        | <b>3.83</b> | 693 ± 76      |        |              |
| 12T | 309 ± 91     |        |              | 5677 ± 476  |        | <b>3.21</b>  | 1986 ± 179 | 0.046  | <b>3.54</b>  | 1795 ± 133 |        |             | 986 ± 214     |        |              |
| 13A | 1067 ± 289   | 0.004  | <b>12.33</b> | 9214 ± 1128 | <0.001 | <b>12.11</b> | 2856 ± 291 | <0.001 | <b>8.86</b>  | 2177 ± 221 |        | 2.64        | 1752 ± 274    | 0.002  | <b>8.34</b>  |
| 14  | 528 ± 105    | 0.044  | <b>4.35</b>  | 6128 ± 641  |        | <b>4.35</b>  | 2221 ± 257 | 0.011  | <b>4.98</b>  | 2468 ± 276 |        | <b>4.79</b> | 1191 ± 160    |        | <b>3.35</b>  |
| 15  | 252 ± 35     |        |              | 1936 ± 279  | <0.001 | <b>6.19</b>  | 654 ± 97   | <0.001 | <b>4.60</b>  | 956 ± 179  | 0.004  | <b>6.40</b> | 301 ± 60      | <0.001 | <b>4.56</b>  |
| 16  | 79 ± 16      |        | 2.31         | 3415 ± 633  |        | 2.48         | 1436 ± 225 |        |              | 1229 ± 122 |        | <b>4.38</b> | 612 ± 126     |        |              |
| 17  | 332 ± 77     |        |              | 5568 ± 306  |        | <b>2.94</b>  | 1693 ± 197 |        |              | 1413 ± 150 |        | <b>3.01</b> | 422 ± 58      |        | <b>3.49</b>  |
| 19  | 303 ± 60     |        |              | 3886 ± 518  |        |              | 1180 ± 151 |        |              | 2177 ± 209 |        | 2.64        | 1057 ± 214    |        | 2.16         |
| Y   | 327 ± 65     |        |              | 3884 ± 445  |        |              | 1221 ± 135 |        |              | 1187 ± 113 | 0.027  | <b>4.69</b> | 533 ± 71      |        | 2.50         |
| B6  | 234 ± 39     |        |              | 4399 ± 281  |        |              | 1407 ± 92  |        |              | 1821 ± 125 |        |             | 814 ± 83      |        |              |
| MSM | 443 ± 95     |        |              | 5501 ± 965  |        |              | 3805 ± 853 |        |              | 1689 ± 612 |        |             | 353 ± 65      |        |              |

p value: t-test after the Bonferroni correction; Z value: Belknap's equation 3.

Z scores, presented as absolute values, are considered to be significant when greater than 2.9.
